# Supplementary material for: An empirical estimate of carrier frequencies for 400+ causal Mendelian variants: results from an ethnically diverse clinical sample of 23,453 individuals
Source: PubMed Central journal article supplement — Genet Med. 2012 Sep 13;15(3):178–86. doi: 10.1038/gim.2012.114 (PMC3908551; doi:10.1038/gim.2012.114), 2012-09-13
Supplement: gim2012114x1.pdf [file gim2012114x1.pdf]

**Supplementary Table A: All Non-Mild Disease Statistics.**

| Disease (OMIM Number)                                              | Total Patients Screened |                | Carrier Frequency |       |         |                          |         |
|--------------------------------------------------------------------|-------------------------|----------------|-------------------|-------|---------|--------------------------|---------|
|                                                                    | n                       | % <sup>a</sup> | n                 | %     | 1 in __ | Wilson 95% CI<br>Lower % | Upper % |
| <b>TOTAL</b>                                                       | 23453                   | 100.0%         | 5633              | 24.0% | 4.2     | 24.0%                    | 24.0%   |
| alpha-1 antitrypsin deficiency (613490)                            | 15484                   | 66.0%          | 1178              | 7.6%  | 13.1    | 7.2%                     | 8.0%    |
| cystic fibrosis (602421)                                           | 23369                   | 99.6%          | 842               | 3.6%  | 27.8    | 3.4%                     | 3.8%    |
| GJB2-related DFNB1 nonsyndromic hearing loss and deafness (220290) | 15799                   | 67.4%          | 371               | 2.3%  | 42.6    | 2.1%                     | 2.6%    |
| spinal muscular atrophy (253300)                                   | 23127                   | 98.6%          | 405               | 1.8%  | 57.1    | 1.6%                     | 1.9%    |
| familial Mediterranean fever (249100)                              | 15854                   | 67.6%          | 247               | 1.6%  | 64.2    | 1.4%                     | 1.8%    |
| Smith-Lemli-Opitz syndrome (270400)                                | 15825                   | 67.5%          | 232               | 1.5%  | 68.2    | 1.3%                     | 1.7%    |
| sickle cell disease (603903)                                       | 21360                   | 91.1%          | 307               | 1.4%  | 69.6    | 1.3%                     | 1.6%    |
| Gaucher disease (230800)                                           | 21473                   | 91.6%          | 280               | 1.3%  | 76.7    | 1.2%                     | 1.5%    |
| factor XI deficiency (612416)                                      | 15724                   | 67.0%          | 171               | 1.1%  | 92.0    | 0.9%                     | 1.3%    |
| achromatopsia (262300)                                             | 15798                   | 67.4%          | 162               | 1.0%  | 97.5    | 0.9%                     | 1.2%    |
| hereditary thymine-uraciluria (274270)                             | 15719                   | 67.0%          | 146               | 0.9%  | 107.7   | 0.8%                     | 1.1%    |
| medium chain acyl-CoA dehydrogenase deficiency (607008)            | 15831                   | 67.5%          | 140               | 0.9%  | 113.1   | 0.7%                     | 1.0%    |
| hereditary fructose intolerance (229600)                           | 15814                   | 67.4%          | 130               | 0.8%  | 121.6   | 0.7%                     | 1.0%    |
| congenital disorder of glycosylation type 1a (212065)              | 15812                   | 67.4%          | 128               | 0.8%  | 123.5   | 0.7%                     | 1.0%    |
| Pompe disease (232300)                                             | 15462                   | 65.9%          | 117               | 0.8%  | 132.2   | 0.6%                     | 0.9%    |
| beta-thalassemia (613985)                                          | 21096                   | 90.0%          | 158               | 0.7%  | 133.5   | 0.6%                     | 0.9%    |
| phenylalanine hydroxylase deficiency (261600)                      | 15852                   | 67.6%          | 112               | 0.7%  | 141.5   | 0.6%                     | 0.8%    |
| hexosaminidase A deficiency (272800)                               | 21958                   | 93.6%          | 141               | 0.6%  | 155.7   | 0.5%                     | 0.8%    |
| Tay-Sachs disease (272800)                                         | 21937                   | 93.5%          | 124               | 0.6%  | 176.9   | 0.5%                     | 0.7%    |
| carnitine palmitoyltransferase II deficiency (600650)              | 15812                   | 67.4%          | 87                | 0.6%  | 181.7   | 0.4%                     | 0.7%    |
| short chain acyl-CoA dehydrogenase deficiency (201470)             | 15810                   | 67.4%          | 69                | 0.4%  | 229.1   | 0.3%                     | 0.6%    |
| glycogen storage disease type V (232600)                           | 15796                   | 67.4%          | 65                | 0.4%  | 243.0   | 0.3%                     | 0.5%    |
| fragile X syndrome (300624)                                        | 3885                    | 16.6%          | 15                | 0.4%  | 259.0   | 0.2%                     | 0.6%    |
| glycogen storage disease type Ia (232200)                          | 17986                   | 76.7%          | 69                | 0.4%  | 260.7   | 0.3%                     | 0.5%    |
| familial dysautonomia (223900)                                     | 21592                   | 92.1%          | 77                | 0.4%  | 280.4   | 0.3%                     | 0.4%    |
| Bardet-Biedl syndrome, BBS1-related (209900)                       | 15727                   | 67.1%          | 56                | 0.4%  | 280.8   | 0.3%                     | 0.5%    |
| Wilson disease (277900)                                            | 15830                   | 67.5%          | 56                | 0.4%  | 282.7   | 0.3%                     | 0.5%    |
| galactosemia (230400)                                              | 15813                   | 67.4%          | 55                | 0.3%  | 287.5   | 0.3%                     | 0.5%    |
| fumarase deficiency (606812)                                       | 3034                    | 12.9%          | 10                | 0.3%  | 303.4   | 0.2%                     | 0.6%    |
| Canavan disease (271900)                                           | 21581                   | 92.0%          | 71                | 0.3%  | 304.0   | 0.3%                     | 0.4%    |
| sulfate transporter-related osteochondrodysplasia (606718)         | 15813                   | 67.4%          | 48                | 0.3%  | 329.4   | 0.2%                     | 0.4%    |
| MYH-associated polyposis (608456)                                  | 3034                    | 12.9%          | 9                 | 0.3%  | 337.1   | 0.2%                     | 0.6%    |
| biotinidase deficiency (253260)                                    | 15811                   | 67.4%          | 38                | 0.2%  | 416.1   | 0.2%                     | 0.3%    |
| maple syrup urine disease type 1B (248600)                         | 17367                   | 74.1%          | 40                | 0.2%  | 434.2   | 0.2%                     | 0.3%    |
| CLN3-related neuronal ceroid lipofuscinosis (204200)               | 12747                   | 54.4%          | 28                | 0.2%  | 455.3   | 0.2%                     | 0.3%    |
| Pendred syndrome (274600)                                          | 15810                   | 67.4%          | 34                | 0.2%  | 465.0   | 0.2%                     | 0.3%    |
| tyrosinemia type 1 (276700)                                        | 15814                   | 67.4%          | 34                | 0.2%  | 465.1   | 0.2%                     | 0.3%    |
| Fanconi anemia type C (227645)                                     | 21476                   | 91.6%          | 44                | 0.2%  | 488.1   | 0.2%                     | 0.3%    |
| Long chain 3-hydroxyacyl-CoA                                       | 15810                   | 67.4%          | 31                | 0.2%  | 510.0   | 0.1%                     | 0.3%    |

|                                                                          |       |       |    |      |         |      |      |
|--------------------------------------------------------------------------|-------|-------|----|------|---------|------|------|
| dehydrogenase deficiency (609016)                                        |       |       |    |      |         |      |      |
| metachromatic leukodystrophy (250100)                                    | 15810 | 67.4% | 30 | 0.2% | 527.0   | 0.1% | 0.3% |
| Niemann-Pick disease, SMPD1-associated (607608)                          | 17773 | 75.8% | 32 | 0.2% | 555.4   | 0.1% | 0.3% |
| very long chain acyl-CoA dehydrogenase deficiency (201475)               | 12665 | 54.0% | 22 | 0.2% | 575.7   | 0.1% | 0.3% |
| PEX1-related Zellweger syndrome spectrum (602136)                        | 12777 | 54.5% | 22 | 0.2% | 580.8   | 0.1% | 0.3% |
| Krabbe disease (245200)                                                  | 15810 | 67.4% | 27 | 0.2% | 585.6   | 0.1% | 0.2% |
| mucopolidosis IV (252600)                                                | 21476 | 91.6% | 36 | 0.2% | 596.6   | 0.1% | 0.2% |
| cystinosis (219800)                                                      | 15797 | 67.4% | 26 | 0.2% | 607.6   | 0.1% | 0.2% |
| Bloom syndrome (210900)                                                  | 21466 | 91.5% | 35 | 0.2% | 613.3   | 0.1% | 0.2% |
| ABCC8-related hyperinsulinism (256450)                                   | 17176 | 73.2% | 28 | 0.2% | 613.4   | 0.1% | 0.2% |
| Niemann Pick disease type A (257200)                                     | 3703  | 15.8% | 6  | 0.2% | 617.2   | 0.1% | 0.4% |
| alkaptonuria (203500)                                                    | 15797 | 67.4% | 25 | 0.2% | 631.9   | 0.1% | 0.2% |
| TPP1-related neuronal ceroid lipofuscinosis (204500)                     | 15810 | 67.4% | 25 | 0.2% | 632.4   | 0.1% | 0.2% |
| Usher syndrome type 3 (276902)                                           | 17777 | 75.8% | 27 | 0.2% | 658.4   | 0.1% | 0.2% |
| Usher syndrome type 1F (602083)                                          | 17778 | 75.8% | 27 | 0.2% | 658.4   | 0.1% | 0.2% |
| lipoamide dehydrogenase deficiency (248600)                              | 17184 | 73.3% | 25 | 0.1% | 687.4   | 0.1% | 0.2% |
| rhizomelic chondrodysplasia punctata type 1 (215100)                     | 15811 | 67.4% | 23 | 0.1% | 687.4   | 0.1% | 0.2% |
| Joubert syndrome (608091)                                                | 14186 | 60.5% | 20 | 0.1% | 709.3   | 0.1% | 0.2% |
| Hurler syndrome (607014)                                                 | 15810 | 67.4% | 21 | 0.1% | 752.9   | 0.1% | 0.2% |
| primary hyperoxaluria type 1 (259900)                                    | 15714 | 67.0% | 20 | 0.1% | 785.7   | 0.1% | 0.2% |
| autosomal recessive polycystic kidney disease (263200)                   | 16644 | 71.0% | 21 | 0.1% | 792.6   | 0.1% | 0.2% |
| isovaleric academia (243500)                                             | 15810 | 67.4% | 19 | 0.1% | 832.1   | 0.1% | 0.2% |
| hypophosphatasia, autosomal recessive (241500)                           | 15810 | 67.4% | 18 | 0.1% | 878.3   | 0.1% | 0.2% |
| Bardet-Biedl syndrome, BBS10-related (209900)                            | 15810 | 67.4% | 16 | 0.1% | 988.1   | 0.1% | 0.2% |
| NEB-related nemaline myopathy (256030)                                   | 14188 | 60.5% | 13 | 0.1% | 1,091.4 | 0.1% | 0.2% |
| Herlitz junctional epidermolysis bullosa, LAMB3-related (226700)         | 15727 | 67.1% | 14 | 0.1% | 1,123.4 | 0.1% | 0.1% |
| homocystinuria caused by cystathionine beta-synthase deficiency (236200) | 15728 | 67.1% | 13 | 0.1% | 1,209.8 | 0.0% | 0.1% |
| citrullinemia type 1 (215700)                                            | 12664 | 54.0% | 10 | 0.1% | 1,266.4 | 0.0% | 0.1% |
| PPT1-related neuronal ceroid lipofuscinosis (256730)                     | 15813 | 67.4% | 12 | 0.1% | 1,317.8 | 0.0% | 0.1% |
| infantile Refsum disease (266510)                                        | 3034  | 12.9% | 2  | 0.1% | 1,517.0 | 0.0% | 0.2% |
| D-bifunctional protein deficiency (261515)                               | 12664 | 54.0% | 8  | 0.1% | 1,583.0 | 0.0% | 0.1% |
| polyglandular autoimmune syndrome type 1 (240300)                        | 15811 | 67.4% | 9  | 0.1% | 1,756.8 | 0.0% | 0.1% |
| cartilage-hair hypoplasia (250250)                                       | 15813 | 67.4% | 9  | 0.1% | 1,757.0 | 0.0% | 0.1% |
| Nijmegen breakage syndrome (251260)                                      | 15810 | 67.4% | 8  | 0.1% | 1,976.3 | 0.0% | 0.1% |
| steroid resistant nephrotic syndrome (600995)                            | 12664 | 54.0% | 6  | 0.0% | 2,110.7 | 0.0% | 0.1% |
| muscle-eye-brain disease (253280)                                        | 15727 | 67.1% | 7  | 0.0% | 2,246.7 | 0.0% | 0.1% |
| glutaric acidemia type 1 (231670)                                        | 15727 | 67.1% | 7  | 0.0% | 2,246.7 | 0.0% | 0.1% |
| ataxia telangiectasia (208900)                                           | 15758 | 67.2% | 7  | 0.0% | 2,251.1 | 0.0% | 0.1% |
| megalencephalic leukoencephalopathy with subcortical cysts (604004)      | 12665 | 54.0% | 5  | 0.0% | 2,533.0 | 0.0% | 0.1% |
| PROP1-related combined pituitary hormone deficiency (262600)             | 12747 | 54.4% | 5  | 0.0% | 2,549.4 | 0.0% | 0.1% |
| primary hyperoxaluria type 2 (260000)                                    | 15714 | 67.0% | 6  | 0.0% | 2,619.0 | 0.0% | 0.1% |
| limb-girdle muscular dystrophy type 2E (604286)                          | 15728 | 67.1% | 6  | 0.0% | 2,621.3 | 0.0% | 0.1% |
| Leigh syndrome, French-Canadian type                                     | 3035  | 12.9% | 1  | 0.0% | 3,035.0 | 0.0% | 0.2% |

|                                                                      |       |       |   |      |          |      |      |
|----------------------------------------------------------------------|-------|-------|---|------|----------|------|------|
| (256000)                                                             |       |       |   |      |          |      |      |
| inclusion body myopathy 2 (600737)                                   | 15728 | 67.1% | 5 | 0.0% | 3,145.6  | 0.0% | 0.1% |
| Niemann Pick disease type C (257220)                                 | 15755 | 67.2% | 5 | 0.0% | 3,151.0  | 0.0% | 0.1% |
| alpha-mannosidosis (248500)                                          | 12664 | 54.0% | 4 | 0.0% | 3,166.0  | 0.0% | 0.1% |
| limb-girdle muscular dystrophy type 2D (608099)                      | 12665 | 54.0% | 4 | 0.0% | 3,166.3  | 0.0% | 0.1% |
| Segawa syndrome (605407)                                             | 15727 | 67.1% | 4 | 0.0% | 3,931.8  | 0.0% | 0.1% |
| glycogen storage disease type 1b (232200)                            | 15730 | 67.1% | 3 | 0.0% | 5,243.3  | 0.0% | 0.1% |
| ataxia with vitamin E deficiency (277460)                            | 15797 | 67.4% | 3 | 0.0% | 5,265.7  | 0.0% | 0.1% |
| carnitine palmitoyltransferase 1a deficiency (600528)                | 15727 | 67.1% | 2 | 0.0% | 7,863.5  | 0.0% | 0.0% |
| Salla disease (604639)                                               | 15800 | 67.4% | 2 | 0.0% | 7,900.0  | 0.0% | 0.0% |
| GRACILE syndrome (603358)                                            | 15810 | 67.4% | 2 | 0.0% | 7,905.0  | 0.0% | 0.0% |
| congenital disorder of glycosylation type 1b (602579)                | 15810 | 67.4% | 2 | 0.0% | 7,905.0  | 0.0% | 0.0% |
| congenital Finnish nephrosis (256300)                                | 15813 | 67.4% | 2 | 0.0% | 7,906.5  | 0.0% | 0.0% |
| Herlitz junctional epidermolysis bullosa, LAMC2-related (226700)     | 15727 | 67.1% | 1 | 0.0% | 15,727.0 | 0.0% | 0.0% |
| glycogen storage disease type III (232400)                           | 15729 | 67.1% | 1 | 0.0% | 15,729.0 | 0.0% | 0.0% |
| Andermann syndrome (218000)                                          | 15800 | 67.4% | 1 | 0.0% | 15,800.0 | 0.0% | 0.0% |
| hyperornithinemia-hyperammonemia-homocitrullinuria syndrome (238970) | 3034  | 12.9% | 0 | 0.0% | N/A      | 0.0% | 0.1% |
| ARSACS (270550)                                                      | 15800 | 67.4% | 0 | 0.0% | N/A      | 0.0% | 0.0% |
| aspartylglycosaminuria (208400)                                      | 15800 | 67.4% | 0 | 0.0% | N/A      | 0.0% | 0.0% |
| CLN5-related neuronal ceroid lipofuscinosis (256731)                 | 15813 | 67.4% | 0 | 0.0% | N/A      | 0.0% | 0.0% |
| choroideremia (303100)                                               | 15797 | 67.4% | 0 | 0.0% | N/A      | 0.0% | 0.0% |
| Northern epilepsy (610003)                                           | 15810 | 67.4% | 0 | 0.0% | N/A      | 0.0% | 0.0% |
| pycnodysostosis (265800)                                             | 15714 | 67.0% | 0 | 0.0% | N/A      | 0.0% | 0.0% |
| Sjogren-Larsson syndrome (270200)                                    | 15728 | 67.1% | 0 | 0.0% | N/A      | 0.0% | 0.0% |
| x-linked juvenile retinoschisis (312700)                             | 15797 | 67.4% | 0 | 0.0% | N/A      | 0.0% | 0.0% |

<sup>a</sup>Percentage of 23,453 individuals screened for a given disease.

**Supplemental Table B: Variants Tested for Each Disease in Table 5**

| <b>Disease</b>                                             | <b>Gene Name</b> | <b>Variant Common Name</b>                                                                                                                                                                                                                                                                                                                                                                                                                                                                                                                                                                                                                                                                                                                                                                                                                                                                                                                                                                                                                                                                               |
|------------------------------------------------------------|------------------|----------------------------------------------------------------------------------------------------------------------------------------------------------------------------------------------------------------------------------------------------------------------------------------------------------------------------------------------------------------------------------------------------------------------------------------------------------------------------------------------------------------------------------------------------------------------------------------------------------------------------------------------------------------------------------------------------------------------------------------------------------------------------------------------------------------------------------------------------------------------------------------------------------------------------------------------------------------------------------------------------------------------------------------------------------------------------------------------------------|
| achromatopsia                                              | <i>CNGB3</i>     | 819_826del8, 886-896del11insT, E336X, IVS8-3T>G, R403Q, T383fs                                                                                                                                                                                                                                                                                                                                                                                                                                                                                                                                                                                                                                                                                                                                                                                                                                                                                                                                                                                                                                           |
| alpha-1 antitrypsin deficiency                             | <i>SERPINA1</i>  | S allele, Z allele                                                                                                                                                                                                                                                                                                                                                                                                                                                                                                                                                                                                                                                                                                                                                                                                                                                                                                                                                                                                                                                                                       |
| biotinidase deficiency                                     | <i>BTBD</i>      | A171T, D252G, D444H, F403V, G98:d7i3, Q456H, R538C                                                                                                                                                                                                                                                                                                                                                                                                                                                                                                                                                                                                                                                                                                                                                                                                                                                                                                                                                                                                                                                       |
| carnitine palmitoyltransferase II deficiency               | <i>CPT2</i>      | G549D, Leu178_Ile186delinsPhe, P227L, P50H, P604S, Q413fs, Q550R, R124X, R503C, R631C, S113L, S38fs, Y628S                                                                                                                                                                                                                                                                                                                                                                                                                                                                                                                                                                                                                                                                                                                                                                                                                                                                                                                                                                                               |
| citrullinemia type 1                                       | <i>ASS1</i>      | G390R, IVS6-2A>G                                                                                                                                                                                                                                                                                                                                                                                                                                                                                                                                                                                                                                                                                                                                                                                                                                                                                                                                                                                                                                                                                         |
| congenital disorder of glycosylation type Ia               | <i>PMM2</i>      | F119L, P113L, R141H, V231M                                                                                                                                                                                                                                                                                                                                                                                                                                                                                                                                                                                                                                                                                                                                                                                                                                                                                                                                                                                                                                                                               |
| cystic fibrosis                                            | <i>CFTR</i>      | 1078delT, 1161delC, 1288insTA, 1609delCA, 1677delTA, 1717-1G>A, 1811+1.6kbA>G, 1812-1G>A, 1898+1G>A, 1898+1G>T, 1898+5G>T, 1949del84, 2043delG, 2055del9>A, 2105-2117del13insAGAAA, 2108delA, 2143delT, 2183AA>G, 2184delA, 2184insA, 2307insA, 2789+5G>A, 2869insG, 296+12T>C, 3120+1G>A, 3120G>A, 3171delC, 3199del6, 3272-26A>G, 3659delC, 3667del4, 3791delC, 3821delT, 3849+10kbC>T, 3849+4A>G, 3876delA, 3905insT, 394delTT, 405+1G>A, 405+3A>C, 406-1G>A, 444delA, 457TAT>G, 574delA, 621+1G>T, 663delT, 711+1G>T, 711+5G>A, 712-1G>T, 935delA, 936delTA, A455E, A559T, C524X, D1152H, E60X, E92X, F311del, F508C, F508del, G178R, G330X, G480C, G542X, G551D, G622D, G85E, G91R, I148T, I506V, I507del, IVS8-5T, K710X, L206W, M1101K, N1303K, P574H, Q1238X, Q359K/T360K, Q493X, Q552X, Q890X, R1066C, R1070Q, R1158X, R1162X, R117C, R117H, R1283M, R334W, R347H, R347P, R352Q, R553X, R560T, R709X, R75X, R764X, S1196X, S1235R, S1251N, S1255X, S364P, S549I, S549N, S549R(A>C), S549R(T>G), T338I, V520F, W1089X, W1204X(c.3611G>A), W1204X(c.3612G>A), W1282X, Y1092X, Y122X, dele2-3 21kb |
| factor XI deficiency                                       | <i>F11</i>       | E117X, F283L, IVS14+1G>A, IVS14del14                                                                                                                                                                                                                                                                                                                                                                                                                                                                                                                                                                                                                                                                                                                                                                                                                                                                                                                                                                                                                                                                     |
| familial dysautonomia                                      | <i>IKBKAP</i>    | IVS20+6T>C, P914L, R696P                                                                                                                                                                                                                                                                                                                                                                                                                                                                                                                                                                                                                                                                                                                                                                                                                                                                                                                                                                                                                                                                                 |
| familial Mediterranean fever                               | <i>MEFV</i>      | A744S, F479L, I692del, K695R, M680I, M694I, M694V, P369S, R408Q, R653H, R761H, T267I, V726A                                                                                                                                                                                                                                                                                                                                                                                                                                                                                                                                                                                                                                                                                                                                                                                                                                                                                                                                                                                                              |
| galactosemia                                               | <i>GALT</i>      | F171S, IVS2-2A>G, K285N, L195P, Q169K, Q188R, S135L, T138M, X380R, Y209C                                                                                                                                                                                                                                                                                                                                                                                                                                                                                                                                                                                                                                                                                                                                                                                                                                                                                                                                                                                                                                 |
| Gaucher disease                                            | <i>GBA</i>       | 1035insG, D409H, D409V, IVS2+1G>A, L444P, N370S, R463C, R463H, R496H, V394L                                                                                                                                                                                                                                                                                                                                                                                                                                                                                                                                                                                                                                                                                                                                                                                                                                                                                                                                                                                                                              |
| GJB2-related DFNB 1 nonsyndromic hearing loss and deafness | <i>GJB2</i>      | 167delT, 235delC, 313del14, 35delG, E120del, L90P, M34T, Q124X, R184P, V37I, W24X, W77R, W77X                                                                                                                                                                                                                                                                                                                                                                                                                                                                                                                                                                                                                                                                                                                                                                                                                                                                                                                                                                                                            |
| hereditary fructose intolerance                            | <i>ALDOB</i>     | A149P, A174D, Delta4E4, N334K, Y204X                                                                                                                                                                                                                                                                                                                                                                                                                                                                                                                                                                                                                                                                                                                                                                                                                                                                                                                                                                                                                                                                     |
| hereditary thymine-uraciluria                              | <i>DPYD</i>      | IVS14+1G>A                                                                                                                                                                                                                                                                                                                                                                                                                                                                                                                                                                                                                                                                                                                                                                                                                                                                                                                                                                                                                                                                                               |

|                                                                   |                |                                                                                                                                                                                                                                                                                                                                                                                                             |
|-------------------------------------------------------------------|----------------|-------------------------------------------------------------------------------------------------------------------------------------------------------------------------------------------------------------------------------------------------------------------------------------------------------------------------------------------------------------------------------------------------------------|
| <b>hexosaminidase A deficiency</b>                                | <i>HEXA</i>    | 1278insTATC, 7.6kb del, G250D, G269S, IVS12+1G>C, IVS7+1G>A, IVS9+1G>A, R170W, R178C, R178H, R247W                                                                                                                                                                                                                                                                                                          |
| <b>inclusion body myopathy 2</b>                                  | <i>GNE</i>     | M712T, V572L                                                                                                                                                                                                                                                                                                                                                                                                |
| <b>medium chain acyl-CoA dehydrogenase deficiency</b>             | <i>ACADM</i>   | G170R, G242R, K304E, L59F, R181C, R181H, Y42H                                                                                                                                                                                                                                                                                                                                                               |
| <b>megalencephalic leukoencephalopathy with subcortical cysts</b> | <i>MLC1</i>    | 135insC, IVS2-10T>A, c.176G>A, c.278C>T                                                                                                                                                                                                                                                                                                                                                                     |
| <b>Pendred syndrome</b>                                           | <i>SLC26A4</i> | E384G, H723R, IVS8+1G>A, L236P, T416P                                                                                                                                                                                                                                                                                                                                                                       |
| <b>phenylalanine hydroxylase deficiency</b>                       | <i>PAH</i>     | E280K, G272X, I65T, IVS-10int-546, IVS12+1G>A, L48S, P281L, R158Q, R252W, R261Q, R408Q, R408W, S349P, Y414C                                                                                                                                                                                                                                                                                                 |
| <b>Pompe disease</b>                                              | <i>GAA</i>     | 525delT, D645E, IVS1-13T>G, R854X                                                                                                                                                                                                                                                                                                                                                                           |
| <b>short chain acyl-CoA dehydrogenase deficiency</b>              | <i>ACADS</i>   | G185S, R107C                                                                                                                                                                                                                                                                                                                                                                                                |
| <b>sickle cell disease/beta thalassemia</b>                       | <i>HBB</i>     | -28A>G, -29A>G, -30T>A, -87C>G, -88C>T, 619 bp deletion, CAP+1 A>C, Glu6fs, Gly16fs, Gly24 T>A, Hb C, Hb D-Punjab, Hb E, Hb O-Arab, Hb S, IVS-I-1(G>A), IVS-I-1(G>T), IVS-I-110, IVS-I-5, IVS-I-6, IVS-II-654, IVS-II-705, IVS-II-745, IVS-II-844, IVS-II-849(A>C), IVS-II-849(A>G), IVS-II-850, K17X, Lys8fs, Phe41fs, Phe71fs, Poly A: AATAAA->AATAAG, Poly A: AATAAA->AATGAA, Pro5fs, Q39X, Ser9fs, W15X |
| <b>Smith-Lemli-Opitz syndrome</b>                                 | <i>DHCR7</i>   | C380Y, E448L, F302L, G410S, IVS8-1G>C, L109P, L157P, R242C, R242H, R352Q, R352W, R404C, S169L, T93M, V326L, W151X(c.452G>A), W151X(c.453G>A)                                                                                                                                                                                                                                                                |
| <b>spinal muscular atrophy</b>                                    | <i>SMN1</i>    | Exon 7 deletion                                                                                                                                                                                                                                                                                                                                                                                             |
| <b>tyrosinemia type I</b>                                         | <i>FAH</i>     | E357X, IVS12+5G>A, IVS6-1G>T, IVS8-1G>C, P261L, Q64H, W262X                                                                                                                                                                                                                                                                                                                                                 |

**Supplementary Table C: References for Literature Estimates of Carrier Frequencies**

| <b>Disease</b>                                             | <b>Literature Frequency (1 in)</b> | <b>Citation</b>                                                                                                                                                                                                                                                                                                                                                                                          |
|------------------------------------------------------------|------------------------------------|----------------------------------------------------------------------------------------------------------------------------------------------------------------------------------------------------------------------------------------------------------------------------------------------------------------------------------------------------------------------------------------------------------|
| <i>All Populations (N=23453)</i>                           |                                    |                                                                                                                                                                                                                                                                                                                                                                                                          |
| alpha-1 antitrypsin deficiency                             | 11.5                               | de Serres, FJ, Blanco, I, Fernández-Bustillo, E(2010). Ethnic differences in alpha-1 antitrypsin deficiency in the United States of America. <i>Ther Adv Respir Dis</i> , 4, 2:63-70.                                                                                                                                                                                                                    |
| cystic fibrosis                                            | 31.7                               | Rohlfes, EM, Zhou, Z, Heim, RA, Nagan, N, Rosenblum, LS, Flynn, K, Scholl, T, Akmaev, VR, Sirko-Osadsa, DA, Allitto, BA, Sugarman, EA(2011). Cystic fibrosis carrier testing in an ethnically diverse US population. <i>Clin. Chem.</i> , 57, 6:841-8.                                                                                                                                                   |
| GJB2-related DFNB 1 nonsyndromic hearing loss and deafness | 42.8                               | Smith RJH, Van Camp G. Nonsyndromic Hearing Loss and Deafness, DFNB1. 1998 Sep 28 [Updated 2011 Jul 14]. In: Pagon RA, Bird TD, Dolan CR, et al., editors. <i>GeneReviews (TM)</i> [Internet]. Seattle (WA): University of Washington, Seattle; 1993-. Available from: <a href="http://www.ncbi.nlm.nih.gov/books/NBK1272/">http://www.ncbi.nlm.nih.gov/books/NBK1272/</a>                               |
| spinal muscular atrophy                                    | 54                                 | Sugarman, EA, Nagan, N, Zhu, H, Akmaev, VR, Zhou, Z, Rohlfes, EM, Flynn, K, Hendrickson, BC, Scholl, T, Sirko-Osadsa, DA, Allitto, BA(2012). Pan-ethnic carrier screening and prenatal diagnosis for spinal muscular atrophy: clinical laboratory analysis of >72,400 specimens. <i>Eur. J. Hum. Genet.</i> , 20, 1:27-32.                                                                               |
| familial Mediterranean fever                               | unknown                            | Mikula, M, Buller, A, Sun, W, Strom, CM(2008). Prevalence of known mutations in the familial Mediterranean fever gene (MEFV) in various carrier screening populations. <i>Genet. Med.</i> , 10, 5:349-52.                                                                                                                                                                                                |
| Smith-Lemli-Opitz syndrome                                 | 123                                | Kelley, RI, Hennekam, RC(2000). The Smith-Lemli-Opitz syndrome. <i>J. Med. Genet.</i> , 37, 5:321-35.                                                                                                                                                                                                                                                                                                    |
| sickle cell disease/beta thalassemia                       | 158                                | Galanello, R, Origa, R(2010). Beta-thalassemia. <i>Orphanet J Rare Dis</i> , 5:11.                                                                                                                                                                                                                                                                                                                       |
| Gaucher disease                                            | 200                                | Horowitz, M, Pasmanik-Chor, M, Borochowitz, Z, Falik-Zaccai, T, Heldmann, K, Carmi, R, Parvari, R, Beit-Or, H, Goldman, B, Peleg, L, Levy-Lahad, E, Renbaum, P, Legum, S, Shomrat, R, Yeger, H, Benbenisti, D, Navon, R, Dror, V, Shohat, M, Magal, N, Navot, N, Eyal, N(1998). Prevalence of glucocerebrosidase mutations in the Israeli Ashkenazi Jewish population. <i>Hum. Mutat.</i> , 12, 4:240-4. |
| factor XI deficiency                                       | rare                               | Duga, S, Salomon, O(2009). Factor XI Deficiency. <i>Semin. Thromb. Hemost.</i> , 35, 4:416-25.                                                                                                                                                                                                                                                                                                           |
| achromatopsia                                              | 123                                | Sharpe LT, Stockman A, Jagle H, Nathans . Opsin genes, cone photopigments, color vision, and color blindness. In: Gegenfurtner K, Sharpe LT, eds. <i>Color Vision: from Genes to Perception</i> . Cambridge: Cambridge University Press; 1999:3-52.                                                                                                                                                      |

*Northwestern Europe (N=12915)*

|                                                            |                       |                                                                                                                                                                                                                                                                                                                                                                            |
|------------------------------------------------------------|-----------------------|----------------------------------------------------------------------------------------------------------------------------------------------------------------------------------------------------------------------------------------------------------------------------------------------------------------------------------------------------------------------------|
| alpha-1 antitrypsin deficiency                             | 11.4                  | de Serres, FJ, Blanco, I, Fernández-Bustillo, E(2010). Ethnic differences in alpha-1 antitrypsin deficiency in the United States of America. <i>Ther Adv Respir Dis</i> , 4, 2:63-70.                                                                                                                                                                                      |
| cystic fibrosis                                            | 28                    | Rohlf, EM, Zhou, Z, Heim, RA, Nagan, N, Rosenblum, LS, Flynn, K, Scholl, T, Akmaev, VR, Sirko-Osadsa, DA, Allitto, BA, Sugarman, EA(2011). Cystic fibrosis carrier testing in an ethnically diverse US population. <i>Clin. Chem.</i> , 57, 6:841-8.                                                                                                                       |
| GJB2-related DFNB 1 nonsyndromic hearing loss and deafness | 33.2                  | Smith RJH, Van Camp G. Nonsyndromic Hearing Loss and Deafness, DFNB1. 1998 Sep 28 [Updated 2011 Jul 14]. In: Pagon RA, Bird TD, Dolan CR, et al., editors. <i>GeneReviews (TM)</i> [Internet]. Seattle (WA): University of Washington, Seattle; 1993-. Available from: <a href="http://www.ncbi.nlm.nih.gov/books/NBK1272/">http://www.ncbi.nlm.nih.gov/books/NBK1272/</a> |
| spinal muscular atrophy                                    | 47                    | Sugarman, EA, Nagan, N, Zhu, H, Akmaev, VR, Zhou, Z, Rohlf, EM, Flynn, K, Hendrickson, BC, Scholl, T, Sirko-Osadsa, DA, Allitto, BA(2012). Pan-ethnic carrier screening and prenatal diagnosis for spinal muscular atrophy: clinical laboratory analysis of >72,400 specimens. <i>Eur. J. Hum. Genet.</i> , 20, 1:27-32.                                                   |
| Smith-Lemli-Opitz syndrome                                 | 123.9                 | Nowaczyk, MJ, Zeesman, S, Waye, JS, Douketis, JD(2004). Incidence of Smith-Lemli-Opitz syndrome in Canada: results of three-year population surveillance. <i>J. Pediatr.</i> , 145, 4:530-5.                                                                                                                                                                               |
| medium chain acyl-CoA dehydrogenase deficiency             | 61.7                  | Grosse, SD, Khoury, MJ, Greene, CL, Crider, KS, Pollitt, RJ(2006). The epidemiology of medium chain acyl-CoA dehydrogenase deficiency: an update. <i>Genet. Med.</i> , 8, 4:205-12.                                                                                                                                                                                        |
| hereditary fructose intolerance                            | 81.1                  | Santer, R, Rischewski, J, von Weihe, M, Niederhaus, M, Schneppenheim, S, Baerlocher, K, Kohlschütter, A, Muntau, A, Posselt, HG, Steinmann, B, Schneppenheim, R(2005). The spectrum of aldolase B (ALDOB) mutations and the prevalence of hereditary fructose intolerance in Central Europe. <i>Hum. Mutat.</i> , 25, 6:594.                                               |
| achromatopsia                                              | 123                   | Sharpe LT, Stockman A, Jagle H, Nathans . Opsin genes, cone photopigments, color vision, and color blindness. In: Gegenfurtner K, Sharpe LT, eds. <i>Color Vision: from Genes to Perception</i> . Cambridge: Cambridge University Press; 1999:3-52.                                                                                                                        |
| hereditary thymine-uraciluria                              | 33                    | Eidens M, Prause S, Weise A, Klemm M, Weber MM, Pfuetzner A. Dihydropyrimidine Dehydrogenase Genotyping and Phenotyping for 5-Fluorouracil Dysmetabolism: Moving Towards Personalized Chemotherapy in Patients with Cancer. <i>Curr Pharmacogenomics Person Med</i> . 2009, 7(4), 275-283.                                                                                 |
| familial Mediterranean fever                               | unknown, assumed rare | Ben-Chetrit, E, Touitou, I(2009). Familial mediterranean Fever in the world. <i>Arthritis Rheum.</i> , 61, 10:1447-53.                                                                                                                                                                                                                                                     |

*Ashkenazi Jewish (N=2410)*

|                                                            |                            |                                                                                                                                                                                                                                                                                                                                                                                                                               |
|------------------------------------------------------------|----------------------------|-------------------------------------------------------------------------------------------------------------------------------------------------------------------------------------------------------------------------------------------------------------------------------------------------------------------------------------------------------------------------------------------------------------------------------|
| factor XI deficiency                                       | 8                          | Gomez, K, Bolton-Maggs, P(2008). Factor XI deficiency. <i>Haemophilia</i> , 14, 6:1183-9.                                                                                                                                                                                                                                                                                                                                     |
| familial Mediterranean fever                               | 10.5                       | Aksentijevich, I, Torosyan, Y, Samuels, J, Centola, M, Pras, E, Chae, JJ, Oddoux, C, Wood, G, Azzaro, MP, Palumbo, G, Giustolisi, R, Pras, M, Ostrer, H, Kastner, DL(1999). Mutation and haplotype studies of familial Mediterranean fever reveal new ancestral relationships and evidence for a high carrier frequency with reduced penetrance in the Ashkenazi Jewish population. <i>Am. J. Hum. Genet.</i> , 64, 4:949-62. |
| Gaucher disease                                            | 17                         | Horowitz, M, Pasmanik-Chor, M, Borochoowitz, Z, Falik-Zaccai, T, Heldmann, K, Carmi, R, Parvari, R, Beit-Or, H, Goldman, B, Peleg, L, Levy-Lahad, E, Renbaum, P, Legum, S, Shomrat, R, Yeager, H, Benbenisti, D, Navon, R, Dror, V, Shohat, M, Magal, N, Navot, N, Eyal, N(1998). Prevalence of glucocerebrosidase mutations in the Israeli Ashkenazi Jewish population. <i>Hum. Mutat.</i> , 12, 4:240-4.                    |
| GJB2-related DFNB 1 nonsyndromic hearing loss and deafness | 21                         | Morell, RJ, Kim, HJ, Hood, LJ, Goforth, L, Friderici, K, Fisher, R, Van Camp, G, Berlin, CI, Oddoux, C, Ostrer, H, Keats, B, Friedman, TB(1998). Mutations in the connexin 26 gene (GJB2) among Ashkenazi Jews with nonsyndromic recessive deafness. <i>N. Engl. J. Med.</i> , 339, 21:1500-5.                                                                                                                                |
| cystic fibrosis                                            | 29                         | Moskowitz SM, Chmiel JF, Stern DL, et al. CFTR-Related Disorders. 2001 Mar 26 [Updated 2008 Feb 19]. In: Pagon RA, Bird TD, Dolan CR, et al., editors. <i>GeneReviews (TM)</i> [Internet]. Seattle (WA): University of Washington, Seattle; 1993-. Available from: <a href="http://www.ncbi.nlm.nih.gov/books/NBK1250/">http://www.ncbi.nlm.nih.gov/books/NBK1250/</a>                                                        |
| alpha-1 antitrypsin deficiency                             | 16                         | de Serres, FJ(2002). Worldwide racial and ethnic distribution of alpha1-antitrypsin deficiency: summary of an analysis of published genetic epidemiologic surveys. <i>Chest</i> , 122, 5:1818-29.                                                                                                                                                                                                                             |
| hexosaminidase A deficiency                                | 27.4                       | Scott, SA, Edelmann, L, Liu, L, Luo, M, Desnick, RJ, Kornreich, R(2010). Experience with carrier screening and prenatal diagnosis for 16 Ashkenazi Jewish genetic diseases. <i>Hum. Mutat.</i> , 31, 11:1240-50.                                                                                                                                                                                                              |
| short chain acyl-CoA dehydrogenase deficiency              | unknown/<br>underdiagnosed | Jethva, R, Bennett, MJ, Vockley, J(2008). Short-chain acyl-coenzyme A dehydrogenase deficiency. <i>Mol. Genet. Metab.</i> , 95, 4:195-200.                                                                                                                                                                                                                                                                                    |
| familial dysautonomia                                      | 31                         | Scott, SA, Edelmann, L, Liu, L, Luo, M, Desnick, RJ, Kornreich, R(2010). Experience with carrier screening and prenatal diagnosis for 16 Ashkenazi Jewish genetic diseases. <i>Hum. Mutat.</i> , 31, 11:1240-50.                                                                                                                                                                                                              |

|                                              |                                 |                                                                                                                                                                                                                                                    |
|----------------------------------------------|---------------------------------|----------------------------------------------------------------------------------------------------------------------------------------------------------------------------------------------------------------------------------------------------|
| carnitine palmitoyltransferase II deficiency | rare/too few patients worldwide | Taroni, F, Verderio, E, Dworzak, F, Willems, PJ, Cavadini, P, DiDonato, S(1993). Identification of a common mutation in the carnitine palmitoyltransferase II gene in familial recurrent myoglobinuria patients. <i>Nat. Genet.</i> , 4, 3:314-20. |
|----------------------------------------------|---------------------------------|----------------------------------------------------------------------------------------------------------------------------------------------------------------------------------------------------------------------------------------------------|

---

*Hispanic (N=2302)*

---

|                                                            |         |                                                                                                                                                                                                                                                                                                                                                                                                                                                                                                                                                                   |
|------------------------------------------------------------|---------|-------------------------------------------------------------------------------------------------------------------------------------------------------------------------------------------------------------------------------------------------------------------------------------------------------------------------------------------------------------------------------------------------------------------------------------------------------------------------------------------------------------------------------------------------------------------|
| alpha-1 antitrypsin deficiency                             | 9.2     | de Serres, FJ, Blanco, I, Fernández-Bustillo, E(2010). Ethnic differences in alpha-1 antitrypsin deficiency in the United States of America. <i>Thorax</i> , 4, 2:63-70.                                                                                                                                                                                                                                                                                                                                                                                          |
| cystic fibrosis                                            | 59      | Rohlfes, EM, Zhou, Z, Heim, RA, Nagan, N, Rosenblum, LS, Flynn, K, Scholl, T, Akmaev, VR, Sirko-Osadsa, DA, Allitto, BA, Sugarman, EA(2011). Cystic fibrosis carrier testing in an ethnically diverse US population. <i>Clin. Chem.</i> , 57, 6:841-8.                                                                                                                                                                                                                                                                                                            |
| GJB2-related DFNB 1 nonsyndromic hearing loss and deafness | 100     | Shan, J, Chobot-Rodd, J, Castellanos, R, Babcock, M, Shanske, A, Parikh, SR, Morrow, BE, Samanich, J(2010). GJB2 mutation spectrum in 209 hearing impaired individuals of predominantly Caribbean Hispanic and African descent. <i>Int. J. Pediatr. Otorhinolaryngol.</i> , 74, 6:611-8.<br>Samanich, J, Lowes, C, Burk, R, Shanske, S, Lu, J, Shanske, A, Morrow, BE(2007). Mutations in GJB2, GJB6, and mitochondrial DNA are rare in African American and Caribbean Hispanic individuals with hearing impairment. <i>Am. J. Med. Genet. A</i> , 143A, 8:830-8. |
| spinal muscular atrophy                                    | 68      | Sugarman, EA, Nagan, N, Zhu, H, Akmaev, VR, Zhou, Z, Rohlfes, EM, Flynn, K, Hendrickson, BC, Scholl, T, Sirko-Osadsa, DA, Allitto, BA(2012). Pan-ethnic carrier screening and prenatal diagnosis for spinal muscular atrophy: clinical laboratory analysis of >72,400 specimens. <i>Eur. J. Hum. Genet.</i> , 20, 1:27-32.                                                                                                                                                                                                                                        |
| sickle cell disease/beta thalassemia                       | 128     | Michlitsch, J, Azimi, M, Hoppe, C, Walters, MC, Lubin, B, Lorey, F, Vichinsky, E(2009). Newborn screening for hemoglobinopathies in California. <i>Pediatr Blood Cancer</i> , 52, 4:486-90.                                                                                                                                                                                                                                                                                                                                                                       |
| Pompe disease                                              | 100     | Taglia, A, Picillo, E, D'Ambrosio, P, Cecio, MR, Viggiano, E, Politano, L(2011). Genetic counseling in Pompe disease. <i>Acta Myol</i> , 30, 3:179-81.                                                                                                                                                                                                                                                                                                                                                                                                            |
| congenital disorder of glycosylation type Ia               | unknown | Schollen, E, Kjaergaard, S, Legius, E, Schwartz, M, Matthijs, G(2000). Lack of Hardy-Weinberg equilibrium for the most prevalent PMM2 mutation in CDG-Ia (congenital disorders of glycosylation type Ia). <i>Eur. J. Hum. Genet.</i> , 8, 5:367-71.                                                                                                                                                                                                                                                                                                               |

|                              |         |                                                                                                                                                                                                                                                                                                                                                                       |
|------------------------------|---------|-----------------------------------------------------------------------------------------------------------------------------------------------------------------------------------------------------------------------------------------------------------------------------------------------------------------------------------------------------------------------|
| familial Mediterranean fever | unknown | Vergara, C, Borzutzky, A, Gutierrez, MA, Iacobelli, S, Talesnik, E, Martinez, ME, Stange, L, Basualdo, J, Maluje, V, Jimenez, R, Wiener, R, Tinoco, J, Jarpa, E, Aróstegui, JI, Yagüe, J, Alvarez-Lobos, M(2012). Clinical and genetic features of hereditary periodic fever syndromes in Hispanic patients: the Chilean experience. Clin. Rheumatol. , 31, 5:829-34. |
|------------------------------|---------|-----------------------------------------------------------------------------------------------------------------------------------------------------------------------------------------------------------------------------------------------------------------------------------------------------------------------------------------------------------------------|

---

*African American (N=1193)*

---

|                                                            |       |                                                                                                                                                                                                                                                                                                                    |
|------------------------------------------------------------|-------|--------------------------------------------------------------------------------------------------------------------------------------------------------------------------------------------------------------------------------------------------------------------------------------------------------------------|
| sickle cell disease/beta thalassemia                       | 10    | Norman, BJ, Miller, SD(2011). Human genome project and sickle cell disease. Soc Work Public Health, 26, 4:405-16.                                                                                                                                                                                                  |
| alpha-1 antitrypsin deficiency                             | 37.3  | de Serres, FJ, Blanco, I, Fernández-Bustillo, E(2010). Ethnic differences in alpha-1 antitrypsin deficiency in the United States of America. Ther Adv Respir Dis, 4, 2:63-70.                                                                                                                                      |
| cystic fibrosis                                            | 84    | Rohlfs, EM, Zhou, Z, Heim, RA, Nagan, N, Rosenblum, LS, Flynn, K, Scholl, T, Akmaev, VR, Sirko-Osadsa, DA, Allitto, BA, Sugarman, EA(2011). Cystic fibrosis carrier testing in an ethnically diverse US population. Clin. Chem. , 57, 6:841-8.                                                                     |
| Pompe disease                                              | 59.7  | Hirschhorn R, Reuser AJ. Glycogen storage disease type II: acid alpha-glucosidase (acid maltase) deficiency. In: Scriver CR, Beaudet A, Sly WS, Valle D, eds. The Metabolic and Molecular Bases of Inherited Disease. New York: McGraw-Hill; 2001:3389-420.                                                        |
| spinal muscular atrophy                                    | 72    | Sugarman, EA, Nagan, N, Zhu, H, Akmaev, VR, Zhou, Z, Rohlfs, EM, Flynn, K, Hendrickson, BC, Scholl, T, Sirko-Osadsa, DA, Allitto, BA(2012). Pan-ethnic carrier screening and prenatal diagnosis for spinal muscular atrophy: clinical laboratory analysis of >72,400 specimens. Eur. J. Hum. Genet. , 20, 1:27-32. |
| galactosemia                                               | 94    | Suzuki, M, West, C, Beutler, E(2001). Large-scale molecular screening for galactosemia alleles in a pan-ethnic population. Hum. Genet. , 109, 2:210-5.                                                                                                                                                             |
| Gaucher disease                                            | 34.6  | Landgren, O, Turesson, I, Gridley, G, Caporaso, NE(2007). Risk of malignant disease among 1525 adult male US Veterans with Gaucher disease. Arch. Intern. Med. , 167, 11:1189-94.                                                                                                                                  |
| GJB2-related DFNB 1 nonsyndromic hearing loss and deafness | 25.3  | Ross, SA, Novak, Z, Kumbala, RA, Zhang, K, Fowler, KB, Boppana, S(2007). GJB2 and GJB6 mutations in children with congenital cytomegalovirus infection. Pediatr. Res. , 61, 6:687-91.                                                                                                                              |
| Smith-Lemli-Opitz syndrome                                 | 137.8 | Wright, BS, Nwokoro, NA, Wassif, CA, Porter, FD, Waye, JS, Eng, B, Nowaczyk, MJ(2003). Carrier frequency of the RSH/Smith-Lemli-Opitz IVS8-1G >C mutation in African Americans. Am. J. Med. Genet. A, 120A, 1:139-41.                                                                                              |

---

*South Asia (N=1123)*

---

|                                                            |                         |                                                                                                                                                                                                                                                                                                                     |
|------------------------------------------------------------|-------------------------|---------------------------------------------------------------------------------------------------------------------------------------------------------------------------------------------------------------------------------------------------------------------------------------------------------------------|
| achromatopsia                                              | 123                     | Sharpe LT, Stockman A, Jagle H, Nathans . Opsin genes, cone photopigments, color vision, and color blindness. In: Gegenfurtner K, Sharpe LT, eds. Color Vision: from Genes to Perception. Cambridge: Cambridge University Press; 1999:3-52.                                                                         |
| sickle cell disease/beta thalassemia                       | 25                      | Madan, N, Sharma, S, Sood, SK, Colah, R, Bhatia, LH(2010). Frequency of -thalassemia trait and other hemoglobinopathies in northern and western India. Indian J Hum Genet, 16, 1:16-25.                                                                                                                             |
| cystic fibrosis                                            | 118                     | Rohlfes, EM, Zhou, Z, Heim, RA, Nagan, N, Rosenblum, LS, Flynn, K, Scholl, T, Akmaev, VR, Sirko-Osadsa, DA, Allitto, BA, Sugarman, EA(2011). Cystic fibrosis carrier testing in an ethnically diverse US population. Clin. Chem. , 57, 6:841-8.                                                                     |
| spinal muscular atrophy                                    | 52                      | Sugarman, EA, Nagan, N, Zhu, H, Akmaev, VR, Zhou, Z, Rohlfes, EM, Flynn, K, Hendrickson, BC, Scholl, T, Sirko-Osadsa, DA, Allitto, BA(2012). Pan-ethnic carrier screening and prenatal diagnosis for spinal muscular atrophy: clinical laboratory analysis of >72,400 specimens. Eur. J. Hum. Genet. , 20, 1:27-32. |
| hereditary thymine-uraciluria                              | 33                      | Morsman, JM, Sludden, J, Ameyaw, MM, Githang'A, J, Indalo, A, Ofori-Adjei, D, McLeod, HL(2000). Evaluation of dihydropyrimidine dehydrogenase activity in South-west Asian, Kenyan and Ghanaian populations. Br J Clin Pharmacol, 50, 3:269-72.                                                                     |
| GJB2-related DFNB 1 nonsyndromic hearing loss and deafness | 148                     | Mahdieh, N, Rabbani, B(2009). Statistical study of 35delG mutation of GJB2 gene: a meta-analysis of carrier frequency. Int J Audiol, 48, 6:363-70.                                                                                                                                                                  |
| megalencephalic leukoencephalopathy with subcortical cysts | unknown, founder effect | Gorospe, JR, Singhal, BS, Kainu, T, Wu, F, Stephan, D, Trent, J, Hoffman, EP, Naidu, S(2004). Indian Agarwal megalencephalic leukodystrophy with cysts is caused by a common MLC1 mutation. Neurology, 62, 6:878-82.                                                                                                |
| biotinidase deficiency                                     | 123                     | Wolf, B(1991). Worldwide survey of neonatal screening for biotinidase deficiency. J. Inherit. Metab. Dis. , 14, 6:923-7.                                                                                                                                                                                            |
| tyrosinemia type I                                         | 173                     | Mitchell GA, Grompe M, Lambert M, Tanguay RM. Hypertyrosinemia. In: Scriver CR, Beaudet AL, Sly WS, Valle D, eds. The Metabolic and Molecular Bases of Inherited Disease. New York: McGraw Hill; 2001:1777-806.                                                                                                     |

---

*Eastern Asia (N=1121)*

|                                                            |          |                                                                                                                                                        |
|------------------------------------------------------------|----------|--------------------------------------------------------------------------------------------------------------------------------------------------------|
| GJB2-related DFNB 1 nonsyndromic hearing loss and deafness | 33 - 200 | Liu, Y, Ke, X, Qi, Y, Li, W, Zhu, P(2002). Connexin26 gene ( GJB2): prevalence of mutations in the Chinese population. J. Hum. Genet. , 47, 12:688-90. |
|------------------------------------------------------------|----------|--------------------------------------------------------------------------------------------------------------------------------------------------------|

|                                      |     |                                                                                                                                                                                                                                                                                                                                                                                                                               |                                                                                                                                                                                                                                                                                                                                                                                                                                                           |
|--------------------------------------|-----|-------------------------------------------------------------------------------------------------------------------------------------------------------------------------------------------------------------------------------------------------------------------------------------------------------------------------------------------------------------------------------------------------------------------------------|-----------------------------------------------------------------------------------------------------------------------------------------------------------------------------------------------------------------------------------------------------------------------------------------------------------------------------------------------------------------------------------------------------------------------------------------------------------|
|                                      |     |                                                                                                                                                                                                                                                                                                                                                                                                                               | Dai, P, Yu, F, Han, B, Liu, X, Wang, G, Li, Q, Yuan, Y, Liu, X, Huang, D, Kang, D, Zhang, X, Yuan, H, Yao, K, Hao, J, He, J, He, Y, Wang, Y, Ye, Q, Yu, Y, Lin, H, Liu, L, Deng, W, Zhu, X, You, Y, Cui, J, Hou, N, Xu, X, Zhang, J, Tang, L, Song, R, Lin, Y, Sun, S, Zhang, R, Wu, H, Ma, Y, Zhu, S, Wu, BL, Han, D, Wong, LJ(2009). GJB2 mutation spectrum in 2,063 Chinese patients with nonsyndromic hearing impairment. <i>J Transl Med</i> , 7:26. |
| sickle cell disease/beta thalassemia | 50  | Li, DZ(2009). Premarital screening for thalassemia in mainland China. <i>Prenat. Diagn.</i> , 29, 6:637-8.                                                                                                                                                                                                                                                                                                                    | Cheng, TC, Orkin, SH, Antonarakis, SE, Potter, MJ, Sexton, JP, Markham, AF, Giardina, PJ, Li, A, Kazazian, HH(1984). beta-Thalassemia in Chinese: use of in vivo RNA analysis and oligonucleotide hybridization in systematic characterization of molecular defects. <i>Proc. Natl. Acad. Sci. U. S. A.</i> , 81, 9:2821-5.                                                                                                                               |
| spinal muscular atrophy              | 59  | Sugarman, EA, Nagan, N, Zhu, H, Akmaev, VR, Zhou, Z, Rohlf, EM, Flynn, K, Hendrickson, BC, Scholl, T, Sirko-Osadsa, DA, Allitto, BA(2012). Pan-ethnic carrier screening and prenatal diagnosis for spinal muscular atrophy: clinical laboratory analysis of >72,400 specimens. <i>Eur. J. Hum. Genet.</i> , 20, 1:27-32.                                                                                                      |                                                                                                                                                                                                                                                                                                                                                                                                                                                           |
| achromatopsia                        | 123 | Sharpe LT, Stockman A, Jagle H, Nathans . Opsin genes, cone photopigments, color vision, and color blindness. In: Gegenfurtner K, Sharpe LT, eds. <i>Color Vision: from Genes to Perception</i> . Cambridge: Cambridge University Press; 1999:3-52.                                                                                                                                                                           |                                                                                                                                                                                                                                                                                                                                                                                                                                                           |
| cystic fibrosis                      | 242 | Rohlf, EM, Zhou, Z, Heim, RA, Nagan, N, Rosenblum, LS, Flynn, K, Scholl, T, Akmaev, VR, Sirko-Osadsa, DA, Allitto, BA, Sugarman, EA(2011). Cystic fibrosis carrier testing in an ethnically diverse US population. <i>Clin. Chem.</i> , 57, 6:841-8.                                                                                                                                                                          |                                                                                                                                                                                                                                                                                                                                                                                                                                                           |
| alpha-1 antitrypsin deficiency       | 450 | de Serres, FJ(2002). Worldwide racial and ethnic distribution of alpha1-antitrypsin deficiency: summary of an analysis of published genetic epidemiologic surveys. <i>Chest</i> , 122, 5:1818-29.                                                                                                                                                                                                                             |                                                                                                                                                                                                                                                                                                                                                                                                                                                           |
| Pendred syndrome                     | 51  | Park, HJ, Shaikat, S, Liu, XZ, Hahn, SH, Naz, S, Ghosh, M, Kim, HN, Moon, SK, Abe, S, Tukamoto, K, Riazuddin, S, Kabra, M, Erdenetungalag, R, Radnaabazar, J, Khan, S, Pandya, A, Usami, SI, Nance, WE, Wilcox, ER, Riazuddin, S, Griffith, AJ(2003). Origins and frequencies of SLC26A4 (PDS) mutations in east and south Asians: global implications for the epidemiology of deafness. <i>J. Med. Genet.</i> , 40, 4:242-8. |                                                                                                                                                                                                                                                                                                                                                                                                                                                           |
| Pompe disease                        | 112 | Lin, CY, Hwang, B, Hsiao, KJ, Jin, YR(1987). Pompe's disease in Chinese and prenatal diagnosis by determination of alpha-glucosidase activity. <i>J. Inherit. Metab. Dis.</i> , 10, 1:11-7.                                                                                                                                                                                                                                   |                                                                                                                                                                                                                                                                                                                                                                                                                                                           |

|                                                            |                                 |                                                                                                                                                                                                                                                                                                                                                                            |
|------------------------------------------------------------|---------------------------------|----------------------------------------------------------------------------------------------------------------------------------------------------------------------------------------------------------------------------------------------------------------------------------------------------------------------------------------------------------------------------|
| carnitine palmitoyltransferase II deficiency               | rare/too few patients worldwide | Taroni, F, Verderio, E, Dworzak, F, Willems, PJ, Cavadini, P, DiDonato, S(1993). Identification of a common mutation in the carnitine palmitoyltransferase II gene in familial recurrent myoglobinuria patients. <i>Nat. Genet.</i> , 4, 3:314-20.                                                                                                                         |
| <hr/> <i>Southern Europe (N=1063)</i> <hr/>                |                                 |                                                                                                                                                                                                                                                                                                                                                                            |
| alpha-1 antitrypsin deficiency                             | 13.1                            | de Serres, FJ, Blanco, I, Fernández-Bustillo, E(2010). Ethnic differences in alpha-1 antitrypsin deficiency in the United States of America. <i>Thorax</i> , 4, 2:63-70.                                                                                                                                                                                                   |
| cystic fibrosis                                            | 28                              | Rohlfes, EM, Zhou, Z, Heim, RA, Nagan, N, Rosenblum, LS, Flynn, K, Scholl, T, Akmaev, VR, Sirko-Osadsa, DA, Allitto, BA, Sugarman, EA(2011). Cystic fibrosis carrier testing in an ethnically diverse US population. <i>Clin. Chem.</i> , 57, 6:841-8.                                                                                                                     |
| GJB2-related DFNB 1 nonsyndromic hearing loss and deafness | 33.2                            | Smith RJH, Van Camp G. Nonsyndromic Hearing Loss and Deafness, DFNB1. 1998 Sep 28 [Updated 2011 Jul 14]. In: Pagon RA, Bird TD, Dolan CR, et al., editors. <i>GeneReviews (TM)</i> [Internet]. Seattle (WA): University of Washington, Seattle; 1993-. Available from: <a href="http://www.ncbi.nlm.nih.gov/books/NBK1272/">http://www.ncbi.nlm.nih.gov/books/NBK1272/</a> |
| spinal muscular atrophy                                    | 47                              | Sugarman, EA, Nagan, N, Zhu, H, Akmaev, VR, Zhou, Z, Rohlfes, EM, Flynn, K, Hendrickson, BC, Scholl, T, Sirko-Osadsa, DA, Allitto, BA(2012). Pan-ethnic carrier screening and prenatal diagnosis for spinal muscular atrophy: clinical laboratory analysis of >72,400 specimens. <i>Eur. J. Hum. Genet.</i> , 20, 1:27-32.                                                 |
| sickle cell disease/beta thalassemia                       | 50                              | Galanello, R, Origa, R(2010). Beta-thalassemia. <i>Orphanet J Rare Dis</i> , 5:11.                                                                                                                                                                                                                                                                                         |
| familial Mediterranean fever                               | unknown                         | Ben-Chetrit, E, Touitou, I(2009). Familial mediterranean Fever in the world. <i>Arthritis Rheum.</i> , 61, 10:1447-53.                                                                                                                                                                                                                                                     |
| phenylalanine hydroxylase deficiency                       | 50.5                            | Scriver CR, Kaufman S (2001) The hyperphenylalaninemias. In: Scriver CR, Beaudet AL, Sly SW, Valle D (eds) <i>Childs B, Kinzler KW, Vogelstein B (assoc eds) The Metabolic and Molecular Bases of Inherited Disease</i> , 8 ed. McGraw-Hill, New York, Ch. 77 2001.                                                                                                        |
| Pompe disease                                              | 100                             | Martiniuk, F, Chen, A, Mack, A, Arvanitopoulos, E, Chen, Y, Rom, WN, Codd, WJ, Hanna, B, Alcabes, P, Raben, N, Plotz, P(1998). Carrier frequency for glycogen storage disease type II in New York and estimates of affected individuals born with the disease. <i>Am. J. Med. Genet.</i> , 79, 1:69-72.                                                                    |
| Smith-Lemli-Opitz syndrome                                 | unknown                         | Nowaczyk, MJ, Zeesman, S, Waye, JS, Douketis, JD(2004). Incidence of Smith-Lemli-Opitz syndrome in Canada: results of three-year population surveillance. <i>J. Pediatr.</i> , 145, 4:530-5.                                                                                                                                                                               |

|                                                            |                        |                                                                                                                                                                                                                                                                                                                                                         |
|------------------------------------------------------------|------------------------|---------------------------------------------------------------------------------------------------------------------------------------------------------------------------------------------------------------------------------------------------------------------------------------------------------------------------------------------------------|
| hereditary thymine-uraciluria                              | 33                     | Eidens M, Prause S, Weise A, Klemm M, Weber MM, Pfuetzner A. Dihydropyrimidine Dehydrogenase Genotyping and Phenotyping for 5-Fluorouracil Dysmetabolism: Moving Towards Personalized Chemotherapy in Patients with Cancer. <i>Curr Pharmacogenomics Person Med.</i> 2009, 7(4), 275-283.                                                               |
| <hr/> <i>Middle East (N=512)</i> <hr/>                     |                        |                                                                                                                                                                                                                                                                                                                                                         |
| familial Mediterranean fever                               | variable (1/10 - 1/20) | Shohat M, Halpern GJ. Familial Mediterranean Fever. 2000 Aug 8 [Updated 2012 Apr 26]. In: Pagon RA, Bird TD, Dolan CR, et al., editors. <i>GeneReviews (TM)</i> [Internet]. Seattle (WA): University of Washington, Seattle; 1993-. Available from: <a href="http://www.ncbi.nlm.nih.gov/books/NBK1227/">http://www.ncbi.nlm.nih.gov/books/NBK1227/</a> |
| sickle cell disease/beta thalassemia                       | 30 (but variable)      | Al-Riyami, A, Ebrahim, GJ(2003). Genetic Blood Disorders Survey in the Sultanate of Oman. <i>J. Trop. Pediatr.</i> , 49 Suppl 1:i1-20.                                                                                                                                                                                                                  |
| hereditary thymine-uraciluria                              | 33                     | Morsman, JM, Sludden, J, Ameyaw, MM, Githang'A, J, Indalo, A, Ofori-Adjei, D, McLeod, HL(2000). Evaluation of dihydropyrimidine dehydrogenase activity in South-west Asian, Kenyan and Ghanaian populations. <i>Br J Clin Pharmacol</i> , 50, 3:269-72.                                                                                                 |
| achromatopsia                                              | 123                    | Sharpe LT, Stockman A, Jagle H, Nathans . Opsin genes, cone photopigments, color vision, and color blindness. In: Gegenfurtner K, Sharpe LT, eds. <i>Color Vision: from Genes to Perception</i> . Cambridge: Cambridge University Press; 1999:3-52.                                                                                                     |
| cystic fibrosis                                            | 91                     | Rohlfs, EM, Zhou, Z, Heim, RA, Nagan, N, Rosenblum, LS, Flynn, K, Scholl, T, Akmaev, VR, Sirko-Osadsa, DA, Allitto, BA, Sugarman, EA(2011). Cystic fibrosis carrier testing in an ethnically diverse US population. <i>Clin. Chem.</i> , 57, 6:841-8.                                                                                                   |
| spinal muscular atrophy                                    | 25                     | Lyahyai, J, Sbiti, A, Barkat, A, Ratbi, I, Sefiani, A(2012). Spinal muscular atrophy carrier frequency and estimated prevalence of the disease in Moroccan newborns. <i>Genet Test Mol Biomarkers</i> , 16, 3:215-8.                                                                                                                                    |
| GJB2-related DFNB 1 nonsyndromic hearing loss and deafness | 83                     | Najmabadi, H, Cucci, RA, Sahebjam, S, Kouchakian, N, Farhadi, M, Kahrizi, K, Arzhang, S, Daneshmandan, N, Javan, K, Smith, RJ(2002). GJB2 mutations in Iranians with autosomal recessive non-syndromic sensorineural hearing loss. <i>Hum. Mutat.</i> , 19, 5:572.                                                                                      |

|                                 |                                            |                                                                                                                                                                                                                                                                                                                                                                                                                                             |
|---------------------------------|--------------------------------------------|---------------------------------------------------------------------------------------------------------------------------------------------------------------------------------------------------------------------------------------------------------------------------------------------------------------------------------------------------------------------------------------------------------------------------------------------|
| inclusion body myopathy 2       | 15 (Iranian Jews),<br>unknown in<br>others | Eisenberg, I, Avidan, N, Potikha, T, Hochner, H, Chen, M, Olender, T, Barash, M, Shemesh, M, Sadeh, M, Grabov-Nardini, G, Shmilevich, I, Friedmann, A, Karpati, G, Bradley, WG, Baumbach, L, Lancet, D, Asher, EB, Beckmann, JS, Argov, Z, Mitrani-Rosenbaum, S(2001). The UDP-N-acetylglucosamine 2-epimerase/N-acetylmannosamine kinase gene is mutated in recessive hereditary inclusion body myopathy. <i>Nat. Genet.</i> , 29, 1:83-7. |
| hereditary fructose intolerance | unknown                                    | James, CL, Rellos, P, Ali, M, Heeley, AF, Cox, TM(1996). Neonatal screening for hereditary fructose intolerance: frequency of the most common mutant aldolase B allele (A149P) in the British population. <i>J. Med. Genet.</i> , 33, 10:837-41.                                                                                                                                                                                            |
| Smith-Lemli-Opitz syndrome      | rare                                       | Al-Owain, M, Imtiaz, F, Shuaib, T, Edrees, A, Al-Amoudi, M, Sakati, N, Al-Hassnan, Z, Bamashmous, H, Rahbeeni, Z, Al-Ameer, S, Faqeih, E, Meyer, B, Al-Hashem, A, Garout, W, Al-Odaib, A, Rashed, M, Al-Aama, J(2012). Smith-Lemli-Opitz syndrome among Arabs. <i>Clin Genet.</i> 82, 2:165-172.                                                                                                                                            |

---
